1 **Potent mouse monoclonal antibodies that block SARS-CoV-2 infection**

2

3 **Youjia Guo<sup>1</sup>, Atsushi Kawaguchi<sup>2,3,4</sup>, Masaru Takeshita<sup>5</sup>, Takeshi Sekiya<sup>2</sup>, Mikako**

4 **Hirohama<sup>2</sup>, Akio Yamashita<sup>6</sup>, the Keio Donner Project, Haruhiko Siomi<sup>1,\*</sup>, Kensaku**

5 **Murano<sup>1,\*</sup>**

6

7 <sup>1</sup>Department of Molecular Biology, Keio University School of Medicine, Tokyo, Japan

8 <sup>2</sup>Department of Infection Biology, Faculty of Medicine, University of Tsukuba, Tsukuba,

9 Japan

10 <sup>3</sup>Transborder Medical Research Center, University of Tsukuba, Tsukuba, Japan

11 <sup>4</sup>Microbiology Research Center for Sustainability, University of Tsukuba, Tsukuba,

12 Japan

13 <sup>5</sup>Division of Rheumatology, Department of Internal Medicine, Keio University School

14 of Medicine, Tokyo, Japan

15 <sup>6</sup>Department of Molecular Biology, Yokohama City University School of Medicine,

16 Yokohama, Japan

17

18

19 \*Corresponding authors: [kmurano@keio.jp](mailto:kmurano@keio.jp) (K.M.), [awa403@keio.jp](mailto:awa403@keio.jp) (H.S.)

20

21 **Keywords:** SARS-CoV-2, spike, mouse monoclonal antibody, neutralizing antibody

22

1    **Abstract**

2            Coronavirus disease 2019 (COVID-19), caused by severe acute respiratory  
3    syndrome coronavirus 2 (SARS-CoV-2), has developed into a global pandemic since its  
4    first outbreak in the winter of 2019. An extensive investigation of SARS-CoV-2 is critical  
5    for disease control. Various recombinant monoclonal antibodies of human origin that  
6    neutralize SARS-CoV-2 infection have been isolated from convalescent patients and will  
7    be applied as therapies and prophylaxis. However, the need for dedicated monoclonal  
8    antibodies in molecular pathology research is not fully addressed. Here, we produced  
9    mouse anti-SARS-CoV-2 spike monoclonal antibodies that exhibit not only robust  
10   performance in immunoassays including western blotting, ELISA, immunofluorescence,  
11   and immunoprecipitation, but also neutralizing activity against SARS-CoV-2 infection *in*  
12   *vitro*. Our monoclonal antibodies are of mouse origin, making them compatible with the  
13   experimental immunoassay setups commonly used in basic molecular biology research  
14   laboratories, and large-scale production and easy distribution are guaranteed by  
15   conventional mouse hybridoma technology.

16

## 1 **Introduction**

2           The outbreak of COVID-19 caused by severe acute respiratory syndrome  
3 coronavirus 2 (SARS-CoV-2) is a threat to global public health and economic  
4 development (Huang et al., 2020; Li et al., 2020). Vaccine and therapeutic discovery  
5 efforts are paramount to restrict the spread of the virus. Passive immunization could have  
6 a major effect on controlling the virus pandemic by providing immediate protection,  
7 complementing the development of prophylactic vaccines (Klasse & Moore, 2020;  
8 Walker & Burton, 2018). Passive immunization against infectious diseases can be traced  
9 back to the late 19th century and the work of Shibasaburo Kitasato and Emil von Behring  
10 on the serotherapy of tetanus and diphtheria. There have been significant developments  
11 in therapies and prophylaxis using antibodies over the past 50 years (Graham &  
12 Ambrosino, 2015).

13           The advent of hybridoma technology in 1975 provided a reliable source of mouse  
14 monoclonal antibodies (Kohler & Milstein, 1975). With the development of humanized  
15 mouse antibodies and subsequent generation of fully human antibodies by various  
16 techniques, monoclonal antibodies have become widely used in therapy and prophylaxis  
17 for cancer, autoimmune diseases, and viral pathogens (Walker & Burton, 2018). Indeed,  
18 a humanized mouse monoclonal antibody neutralizing respiratory syncytial virus (RSV),  
19 palivizumab, is widely used in clinical settings prophylactically to protect vulnerable  
20 infants (Connor, 1999). In recent years, highly specific and often broadly active  
21 neutralizing monoclonal antibodies have been developed against several viruses (Caskey,  
22 Klein, & Nussenzweig, 2019; Corti et al., 2017; Davide Corti et al., 2016; Corti, Passini,  
23 Lanzavecchia, & Zambon, 2016; Walker & Burton, 2018). Passive immunization with a  
24 monoclonal antibody is currently under consideration as a treatment for COVID-19

1 caused by SARS-CoV-2 (Dhama et al., 2020; Jawhara, 2020; Jiang, Hillyer, & Du, 2020;  
2 Klasse & Moore, 2020; Ni et al., 2020).

3 Isolation of multiple human neutralizing monoclonal antibodies against SARS-  
4 CoV-2 has been reported (Cao et al., 2020; Chen et al., 2020; Chi et al., 2020; Hassan et  
5 al., 2020; Ju et al., 2020; Liu et al., 2020; Pinto et al., 2020; Robbiani et al., 2020; Rogers  
6 et al., 2020; Shi et al., 2020; Wan et al., 2020; Wang et al., 2020; Wu et al., 2020; Zeng et  
7 al., 2020; Zost et al., 2020). These antibodies can avoid the potential risks of human-anti-  
8 mouse antibody responses and other side effects (Hansel, Kropshofer, Singer, Mitchell,  
9 & George, 2010). They will be appropriate for direct use in humans since they are  
10 humanized even if these monoclonal antibodies are recombinant. Owing to the recent  
11 rapid development of single-cell cloning technology, the process of antibody isolation has  
12 been dramatically shortened compared with the generation of a conventional monoclonal  
13 antibody secreted from a hybridoma resulting from the fusion of a mouse myeloma with  
14 B cells (Wan et al., 2020). However, since they are recombinant human antibodies  
15 produced in HEK293 cell lines derived from human embryonic kidney, they have a  
16 disadvantage compared to conventional hybridoma-produced antibodies in terms of their  
17 lot-to-lot quality control and manufacturing costs (Cohen, 2020). Instead, monoclonal  
18 antibodies produced by hybridomas are secreted into the culture supernatant, thus their  
19 production is straightforward and of low cost, and their quality is stable. It is also easy to  
20 distribute them to researchers worldwide, although they will not be applicable for  
21 treatment, if not chimeric and humanized, due to their immunogenicity (Hansel et al.,  
22 2010; Reichert, Rosensweig, Faden, & Dewitz, 2005).

23 In addition to the impact of monoclonal antibodies on therapy and prophylaxis,  
24 they significantly impact the characterization of SARS-CoV-2. To overcome the long-

1 term battle with the virus, we need a detailed understanding of the replication mechanisms  
2 underlying its lifecycle, including viral entry, genome replication, budding from the  
3 cellular membrane, and interaction with host immune systems. These essential pieces of  
4 information are required for drug discovery, vaccine design, and therapy development.  
5 Despite the large number of neutralizing antibodies reported to inhibit infection, there is  
6 an overwhelming lack of data on a well-characterized antibody available for basic  
7 research techniques such as western blotting, immunofluorescence, and  
8 immunoprecipitation to study the viral life cycle.

9 Here, we established six monoclonal antibodies against the spike glycoprotein  
10 of SARS-CoV-2. The trimeric spike glycoproteins of SARS-CoV-2 play a pivotal role in  
11 viral entry into human target cells through the same receptor, angiotensin-converting  
12 enzyme 2 (ACE2) as SARS-CoV-1 (Hoffmann et al., 2020). Our antibodies were  
13 produced by a hybridoma resulting from the fusion of a mouse myeloma SP2/0 with  
14 splenocytes obtained from BALB/c mice immunized with purified recombinant spike  
15 proteins. We evaluated these antibodies for application in molecular pathology research.  
16 Among them, two antibodies were shown to attenuate the interaction of spike proteins  
17 with ACE2 and neutralized infection of VeroE6/TMPRSS2 cells by SARS-CoV-2. Our  
18 antibodies will accelerate research on SARS-CoV-2 and lead to new therapies and  
19 prophylaxis.

20

## 1 **Results**

### 2 **Production of six monoclonal antibodies against spike glycoprotein**

3           The SARS-CoV-2 spike glycoprotein is a homotrimeric fusion protein composed  
4 of two subunits: S1 and S2. During infection, the receptor binding domain (RBD) on S1  
5 subunit binds to ACE2, resulting in destabilization of the spike protein's metastable  
6 conformation. Once destabilized, the spike protein is cleaved into the N-terminal S1 and  
7 C-terminal S2 subunits by host proteases such as TMPRSS2 and changes conformation  
8 irreversibly from the prefusion to the postfusion state (Hoffmann et al., 2020; Ou et al.,  
9 2020; Song, Gui, Wang, & Xiang, 2018), which triggers an infusion process mediated by  
10 the S2 region (Tai, Zhang, He, Jiang, & Du, 2020; Walls et al., 2020). The instability  
11 needs to be addressed to obtain high-quality spike proteins for downstream applications.  
12 We adopted the design principle reported by Wrapp *et al.* (Wrapp et al., 2020), in which  
13 the SARS-CoV-2 spike protein was engineered to form a stable homotrimer that was  
14 resistant to proteolysis during protein preparation. In our practice, recombinant spike  
15 protein RBD and ectodomain were constructed. A T4 fabritin trimerization motif (foldon)  
16 was incorporated into the C-terminal of the recombinant spike ectodomain to promote  
17 homotrimer formation (Miroshnikov et al., 1998) (Fig. 1A). Recombinant RBD proteins  
18 tagged with GST or MBP were produced using an *E. coli* expression system (Fig. 1B).  
19 Both recombinant spike protein RBD and ectodomain (S $\Delta$ TM) were produced using a  
20 mammalian expression system that retained proper protein glycosylation equivalent to  
21 that observed during virus replication (Fig. 1C, S1A). Mice were immunized with these  
22 recombinant spike proteins to generate antibodies against the SARS-CoV-2 virus,  
23 followed by cell fusion to generate a hybridoma-producing antibody. Culture supernatants  
24 were pre-screened by enzyme-linked immunosorbent assay (ELISA), western blotting

1 (WB), and immunoprecipitation (IP), and six monoclonal hybridomas were isolated and  
2 evaluated.

3 To characterize these antibodies in detail, they were first purified from the  
4 culture supernatant and examined in terms of ELISA and WB performance. Four  
5 monoclonal antibodies derived from the antigen produced by *E. coli* (Clones R15, R22,  
6 R31, and R52) and two from mammalian cells (S1D7 and S3D8) showed remarkable  
7 performance. In the ELISA binding assay, all six clones bound glycosylated RBD with  
8 high affinity. When tested against spike glycoprotein (SΔTM), two clones (R15 and R52)  
9 could not be distinguished from non-immune IgG (Fig. 1D). We noted that IgG2 subclass  
10 members tended to have higher binding affinities. Half maximal effective concentration  
11 (EC<sub>50</sub>) required for these antibodies to bind RBD and SΔTM glycoproteins falls at the  
12 low hundreds ng/mL (Fig. 1E). In WB, where target proteins are reduced and denatured,  
13 all clones established by *E. coli* produced-antigens performed well at detecting RBD and  
14 SΔTM proteins regardless of glycosylation (Fig. 1F, left, and 1G, S1B). Among them,  
15 clones R15 and R52 showed higher sensitivity in WB. In addition, R52 was capable of  
16 detecting not only artificial spike glycoprotein carrying T4 foldon, but also native spike  
17 glycoprotein expressed in 293T cells on WB (Fig. 1H). However, neither RBD nor SΔTM  
18 could be detected by antibody clones established by the mammalian antigen (S1D7 and  
19 S3D8) on WB, suggesting a strong preference for intact tertiary structure (Fig. 1F, right).

20

### 21 **S1D7 and S3D8 antibodies showed higher performance on IP and IF**

22 An antibody capable of recognizing the intact tertiary structure of spike proteins  
23 would contribute to research dissecting the molecular mechanism of SARS-CoV-2  
24 infection, especially cell entry, where these proteins play a significant role. The IP activity

1 of antibodies can be correlated with the activity of capturing the native structure of the  
2 target protein and neutralizing the infection. We examined the IP performance of our  
3 monoclonal antibodies. Although all clones were capable of immunoprecipitating RBD  
4 and S $\Delta$ TM glycoproteins, clone R22, R31, S1D7, and S3D8 demonstrated superior IP  
5 efficiency for S $\Delta$ TM, whereas R22, S1D7, and S3D8 showed higher IP efficiency for  
6 RBD glycoprotein (Fig 2A). As shown in Fig. 2B, our antibodies recognize the spike  
7 protein in a glycosylation-independent manner, and the IP efficiencies of R22, R31, S1D7,  
8 and S3D8, although mild, outperformed others. Noticeably, although clones S1D7 and  
9 S3D8 are not capable of performing WB (Fig. 1F), a strong preference for tertiary  
10 structure grants them remarkable performance in IP, where RBD and S $\Delta$ TM  
11 glycoproteins were pulled down in their native conformation. Of note, we found that  
12 S1D7 and S3D8 could maintain intact IP efficiency under highly stringent experimental  
13 conditions where sodium dodecyl sulfate (SDS) was present (Fig S2A).

14 Next, we examined whether our antibodies could be used in the  
15 immunofluorescence assay (IF). An antibody applicable for IP would also have activity  
16 in IF. Cellular localization of spike proteins is essential for elucidating the mechanism of  
17 packaging and maturation of virions during release from the cellular membrane. We tested  
18 our antibodies' performance in IF using HeLa cells overexpressing trimeric spike protein  
19 with the transmembrane domain. Consistent with their performance in the above-  
20 mentioned assays (Fig. 2A and 2B), both S1D7 and S3D8 could detect spike proteins  
21 expressed homogeneously on the apical side of HeLa cells with a high signal-to-noise  
22 ratio (Fig. 2C and S2B). However, their localization pattern is different from a previous  
23 report that observed spike proteins exclusively in the Golgi during SARS-CoV-1 infection  
24 (Stertz et al., 2007). One possible reason for the difference could be that the spikes were



1 expressed with no other viral proteins (see also Fig. 4B). Mouse hepatitis coronavirus  
2 spike protein localizes in the endoplasmic reticulum-Golgi intermediate compartment  
3 (ERGIC) in a membrane (M) protein dependent manner. In contrast, when expressed by  
4 itself, the spike had a faint reticular appearance (Artika, Dewantari, & Wiyatno, 2020;  
5 Opstelten, Raamsman, Wolfs, Horzinek, & Rottier, 1995).

6

### 7 **ACE2-Spike binding inhibition of the monoclonal antibodies**

8         The manner in which antibodies bind and pull down spike glycoproteins in an IP  
9 experiment resembles the process of antibody-mediated neutralization, where spike-  
10 ACE2 interaction is intercepted by competitive binding between neutralizing antibodies  
11 and spike glycoprotein. The performance of our antibodies in IP experiments prompted  
12 us to examine whether they were capable of inhibiting spike-ACE2 binding or even  
13 neutralizing SARS-CoV-2 infection. First, we performed a spike pull-down assay in  
14 which the spike glycoprotein was pulled down by ACE2 in the presence of monoclonal  
15 antibodies (Fig. 3A and S3A). Clones S1D7 and S3D8 clearly inhibited spike-ACE2  
16 binding, as shown by the dimmed spike signal in WB (Fig. 3B). To quantify the inhibition  
17 ability, we performed a bead-based neutralization assay by measuring the amount of  
18 ACE2 bound to RBD beads after blocking with monoclonal antibodies (Fig. 3C).  
19 Antibodies R22 and R31 showed no disruption of ACE2-RBD interaction, whereas S1D7  
20 and S3D8 showed robust hindrance of ACE2-RBD binding with IC<sub>50</sub> values of 248.2  
21 ng/mL and 225.6 ng/mL, respectively (Fig. 3D and 3E). S1D7 and S3D8's abilities to  
22 inhibit spike-ACE2 binding was consistent with their superior performance in IP  
23 experiments.

24

1 **S1D7 and S3D8 showed neutralizing activity against SARS-CoV-2**

2           Next, we asked whether our antibodies inhibit SARS-CoV-2 infection in  
3 VeroE6/TMPRSS2 (TM2) cells, which is susceptible to SARS-CoV-2 infection compared  
4 with the parental VeroE6 cell line by expressing TMPRSS2 (Matsuyama et al., 2020). In  
5 WB, antibodies R52 and R22, but not S1D7 and S3D8, could detect spike glycoprotein  
6 along with the progression of SARS-CoV-2 infection in VeroE6/TM2 cells (Fig. 4A). On  
7 the other hand, S1D7 and S3D8 were applicable to IF in infected VeroE6/TM2 cells.  
8 Spike showed a punctate distribution pattern in the perinuclear region resembling ER and  
9 ERGIC (Sadasivan, Singh, & Sarma, 2017) (Fig. 4B). The subcellular localization of  
10 spike resembled that of the N protein in Vero cells infected with SARS-CoV-1 (Stertz et  
11 al., 2007), suggesting assembly of SARS-CoV-2 virion in the cytoplasm. We then  
12 conducted a live virus neutralization assay to examine whether clones S1D7 and S3D8  
13 inhibit the live virus infection. As expected, although clone R22 failed to protect  
14 VeroE6/TM2 from SARS-CoV-2 infection, S1D7 and S3D8 blocked SARS-CoV-2  
15 infection significantly with IC<sub>50</sub> values of 405.2 ng/mL and 139 ng/mL, respectively, even  
16 at relatively high titers of 1500 TCID<sub>50</sub> (Fig. 4C, Table 1). A cocktail of S1D7 and S3D8  
17 showed intermediate neutralizing activity (200.1 ng/mL), suggesting that S1D7 and S3D8  
18 share an inhibitory mechanism.  
19

## 1 **Discussion**

2 Emerging SARS-CoV-2 is a global public health threat to society, which is  
3 predicted to be long-term for several years (Kissler, Tedijanto, Goldstein, Grad, &  
4 Lipsitch, 2020). Although there are multiple ongoing endeavors to develop neutralizing  
5 antibodies, vaccines, and drugs against the virus (Callaway, 2020; Riva et al., 2020), the  
6 lack of adequate, licensed countermeasures underscores the need for a more detailed and  
7 comprehensive understanding of the molecular mechanisms underlying the pathogenesis  
8 of the virus (Artika et al., 2020). Fundamental knowledge has significant implications for  
9 developing countermeasures against the virus, including diagnosis, vaccine design, and  
10 drug discovery. Due to the above reasons, and our experiences with routine antibody  
11 productions (Iwasaki et al., 2016; Murano et al., 2019), we have established and  
12 characterized mouse monoclonal antibodies that can be used to dissect the molecular  
13 mechanism of the virus life cycle. These antibodies would serve as a reliable toolset for  
14 basic research investigating the expression profile and subcellular localization of spike  
15 glycoprotein during viral entry, replication, packaging, and budding. These antibodies  
16 could help to identify novel host factors interacting with spike glycoprotein when used in  
17 IP in combination with mass spectrometry. Therefore, advancement in basic research  
18 would accelerate the discovery of drugs targeting virus transmission.

19 Since passive immunization with neutralizing antibodies has been proposed as a  
20 treatment for COVID-19 (Dhama et al., 2020; Jawhara, 2020; S. Jiang et al., 2020; Klasse  
21 & Moore, 2020; Ni et al., 2020), research interests have largely focused on cloning human  
22 neutralizing antibodies from COVID-19 patients. Our antibodies, S1D7 and S3D8, have  
23 been shown to attenuate the interaction of spike proteins with ACE2 and neutralize  
24 infection of VeroE6/TM2 cells by SARS-CoV-2. It is worth noting that although their

1 neutralizing activities (IC<sub>50</sub> of 405.2 ng/ml and 139 ng/ml) appeared to be lower than  
2 those of human antibodies reported previously (Fig. 4C and Table 1), the stringency of  
3 experimental conditions (relatively high virus titer of 1500 TCID<sub>50</sub>) tend to underestimate  
4 neutralizing activities of our antibodies compared to other research groups. Specifically,  
5 we used a high multiplicity of live SARS-CoV-2 virus to infect VeroE6/TM2 cells, which  
6 are more prone to virus infection than the commonly adopted VeroE6 cell line. Therefore,  
7 it is difficult to compare antibody efficacy among them (Tse, Meganck, Graham, & Baric,  
8 2020). In addition to *in vitro* infection, their neutralizing activity *in vivo* should be  
9 examined in animal models that recapitulate SARS-CoV-2 disease. Our mouse antibodies  
10 will not be applicable for use in clinical treatment, if not chimeric and humanized, due to  
11 their immunogenicity (Hansel et al., 2010; Reichert et al., 2005). On the other hand, they  
12 may be valuable for investigating the mechanism of immune responses to the virus during  
13 passive immunization using mouse models for SARS-CoV-2 infection (Bao et al., 2020;  
14 Dinno et al., 2020; Hassan et al., 2020; Israelow et al., 2020; R. D. Jiang et al., 2020;  
15 Winkler et al., 2020). They could show stable performance due to lot-to-lot consistency  
16 and act as benchmarks for other antibodies and drug developments.

17

## 1 **Acknowledgements**

2 We thank Ayako Ishida, Mie Kobayashi, and Yasuyuki Kurihara for technical  
3 assistance and advice on the production of antibodies. This work was supported by the  
4 Keio University Global Research Institute (KGRI) COVID-19 Pandemic Crisis Research  
5 Grant (to M.T., H.S., and K.M.) and the Keio Donner Project, which is devoted to  
6 Shibasaburo Kitasato, the founder of Keio University School of Medicine. The project  
7 was built under the leadership of the top officials of Keio University, Tsutomu Takeuchi  
8 (Vice-President), Masayuki Amagai (Dean of the School of Medicine), Yuko Kitagawa  
9 (Hospital Director General), and Hideyuki Saya (Project Coordinator). This study was  
10 also supported in part by AMED (JP18fk0108076 to A.K.), NOMURA Microbial  
11 Community Control Project in ERATO of the Japan Science and Technology Agency (to  
12 A.K.), and Research Support Program to Tackle COVID-19 Related Emergency  
13 Problems, University of Tsukuba (to A.K.).

14

## 15 **Author contributions**

16 Y.G., H.S., and K.M. conceived the project, designed the experiments and wrote  
17 the manuscript. Y.G., A.K., M.T., and K.M. performed the experiments. All authors  
18 analyzed the data and contributed to the preparation of the manuscript.

19

## 20 **Competing interests**

21 The authors declare no competing interests.

22

## 1 **Materials and Methods**

### 2 **Expression and purification of proteins in human cells**

3 Synthetic DNA sequences encoding SARS-CoV-2 spike protein ectodomain  
4 (S $\Delta$ TM, residue 1-1208; strain Wuhan-hu-1; GenBank: QHD43416.1) and RBD (residue  
5 319-591; strain Wuhan-hu-1; GenBank: QHD43416.1) fused with an N-terminal signal  
6 peptide, a C-terminal trimerization motif, an HRV3C cleavage site, an SBP purification  
7 tag, and an 8xHis-tag were inserted into pEFx mammalian expression vector. S1/S2 (682-  
8 RRAR-685) and S2' (986-KV-987) cleavage sites of spike protein were mutated (682-  
9 GSAS-685, 986-PP-987, respectively) to prevent protease cleavage. The codon  
10 composition of DNA fragments was optimized and synthesized for protein expression in  
11 human cells (FASMAC). Full-length spike, human ACE2-SBP (residue 1-708;  
12 NP\_001358344), and ACE2-FLAG were synthesized and cloned into pcDNA3.4 vector  
13 (Thermo Fisher). Recombinant proteins were prepared by Expi293 Expression System  
14 (Thermo Fisher) according to the manufacturer's instruction. They were secreted into  
15 culture medium supernatant of the Expi293F cells, and then affinity purified by  
16 Streptavidin Sepharose High Performance (Cytiva). Purification tags were removed by  
17 treating recombinant proteins with HRV3C protease (TaKaRa) and cComplete™ His-tag  
18 Purification Resin (Roche). Purity and glycosylation of recombinant proteins were  
19 examined by PNGase F (N-Zyme Scientifics) treatment followed by SDS-PAGE and  
20 Coomassie staining. The containment measures for the living modified organisms  
21 in all experiments were confirmed by the Ministry of Education, Culture, Sports,  
22 Science and Technology of Japan on April 27, 2020.

23

### 24 **Expression and purification of proteins in *E. coli***

1           The DNA sequence encoding SARS-CoV-2 spike protein RBD (residue 410-  
2 580; strain Wuhan-hu-1; GenBank: QHD43416.1) was amplified from a nasopharyngeal  
3 swab of a patient treated in the Keio University Hospital, and in-framed inserted into  
4 pGEX-5X-1 and pMAL-c2G *E. coli* expression plasmid, downstream of GST-tag and  
5 MBP-tag encoding sequence respectively. Sample collection is approved by Keio  
6 University Bioethics Committee with the number 20200063. Recombinant proteins were  
7 expressed in overnight 16°C cultured BL21(DE3)pLysS competent cells transformed by  
8 corresponding vector under induction of 1 mM Isopropyl  $\beta$ -D-1-thiogalactopyranoside  
9 (IPTG). MBP-tagged RBD was affinity purified by Amylose Resin (NEB) according to  
10 manufacturer's instructions; GST-tagged RBD was affinity purified by Glutathione  
11 Sepharose 4B (Cytiva) according to manufacturer's instructions. Purity of purified  
12 recombinant proteins were examined by SDS-PAGE followed by Coomassie staining.

13

#### 14 **Cell cultures**

15           The mouse myeloma cell line SP2/0-Ag14 (RCB0209) was provided by the  
16 Riken Bioresources Center (Tsukuba, Japan). The cells were cultured in RPMI 1640  
17 (Nissui) supplemented with 10% heat-inactivated calf serum (Biowest) and 1 ng/mL  
18 recombinant human interleukin 6 (IL-6, PeproTech). HeLa and 293T cells were cultured  
19 in DMEM (Nacalai tesque) with 10% fetal bovine serum (Biowest). We maintained  
20 hybridoma clones against spike glycoproteins in Hybridoma Serum-free Medium  
21 (FUJIFILM Wako) supplemented with 1 ng/mL IL-6.

22

#### 23 **Production of monoclonal antibodies**

24           BALB/c mice were immunized twice in 3-week intervals, with the second

1 immunization serving as a booster. Mice were injected intraperitoneally with 100  $\mu$ L  
2 chyle containing 10-50  $\mu$ g antigen prepared with TiterMax Gold adjuvant (Sigma-  
3 Aldrich) according to the manufacturer's instructions. Four days after boosting,  
4 splenocytes of immunized mice were collected by grinding the spleens in RPMI 1640  
5 medium. Splenocytes ( $1 \times 10^8$ ) were immediately mixed with  $5 \times 10^7$  SP2/0 myeloma cells  
6 and fused using an electro cell fusion generator ECFG21 (NepaGene) according to the  
7 manufacturer's instructions. After fusion, cells were cultured in HAT medium (RPMI  
8 1640 supplemented with 10% calf serum containing HT supplement (Gibco) and 0.4  $\mu$ M  
9 aminopterin (Sigma-Aldrich)) for 10 days to select hybridomas. Hybridomas were  
10 subsequently screened by ELISA, in which RBD glycoproteins were generated from the  
11 Expi293F expression system. We performed western blotting and immunoprecipitation  
12 for further screening and subjected to monoclonization by serial dilution. For antibody  
13 production, monoclonal hybridomas were cultured in Hybridoma Serum-Free Medium  
14 (FUJIFILM Wako) supplemented with IL-6. Monoclonal antibodies were purified from  
15 hybridoma culture supernatants using Thiophilic-Superflow Resin (Clontech) or Ab-  
16 Capcher MAG2 (ProteNova) according to the manufacturer's instructions. The isotype of  
17 antibodies was determined using the IsoStrip Mouse Monoclonal Antibody Isotyping Kit  
18 (Roche).

19

## 20 **Western blotting and immunoprecipitation**

21 SATM and RBD glycoproteins were resolved on SDS-PAGE and transferred  
22 onto a nitrocellulose membrane (Amersham Protran, GE Healthcare). Lysates of 293T  
23 cells transfected with plasmids encoding full-length spike glycoproteins was also  
24 separated by SDS-PAGE for WB. The membrane was blocked in 1% nonfat skim milk



1 and then incubated in 1  $\mu\text{g}/\text{mL}$  anti-spike antibodies for 1h at room temperature. After  
2 three times washing in PBS-T (0.1% Tween-20), the membrane was incubated in 1:5000  
3 dilution of the peroxidase-conjugated sheep anti-mouse IgG secondary antibody (MP  
4 Biomedicals) for 30 min at room temperature. Signals were detected using ECL Western  
5 Blotting Detection Reagents (GE Healthcare).

6 For immunoprecipitation assay, 1  $\mu\text{g}$  of purified antibodies was conjugated to 10  
7  $\mu\text{l}$  Dynabeads Protein G (Thermo Fisher) for 30 min at room temperature, followed by  
8 washing twice in IP buffer (20 mM Tris-HCl(pH 7.4), 150 mM NaCl, 0.1% NP-40).  
9 Antibody conjugated beads were incubated with 100 ng S $\Delta$ TM in 50  $\mu\text{l}$  IP buffer for 2  
10 hours at room temperature. Beads were washed three times in IP buffer and eluted with  
11 SDS-PAGE loading dye at 95°C for 5 min. Immunoprecipitation of S $\Delta$ TM was examined  
12 by SDS-PAGE followed by western blotting using antibody R52.

13

#### 14 **Immunofluorescence**

15 Before performing immunofluorescence, HeLa cells seeded on cover glasses  
16 were transfected with plasmids encoding full length SARS-CoV-2 spike protein for 2 days  
17 using Lipofectamine 2000 (Thermo Fisher). Cells were fixed with 2% formaldehyde in  
18 PBS for 10 min at room temperature, washed in PBS-T once, and permeabilized with  
19 0.1% Triton X-100 in PBS for 10 min at room temperature. Cells were blocked by 1%  
20 non-fat skim milk in PBS-T for 10 min, then incubated with 0.5  $\mu\text{g}/\text{mL}$  antibody for 1 h  
21 at room temperature. After three times wash in PBS-T, cells were incubated in 1:500  
22 diluted Alexa Fluor 488 conjugated goat anti-mouse IgG secondary antibody (Thermo  
23 Fisher) and 1  $\mu\text{g}/\text{mL}$  DAPI solution for 30 min at room temperature. The cover glasses  
24 were mounted with Prolong Glass Antifade Mountant (Thermo Fisher) overnight at room

1 temperature before observing. The fluorescence images were taken with Keyence BZ-  
2 X810 fluorescence microscope and Olympus FV3000 confocal laser scanning  
3 microscope.

4

#### 5 **ELISA of antibody binding to SARS-CoV-2 spike protein**

6 Nunc MaxiSorp™ flat-bottom 96-well plates (Thermo Fisher) were coated with  
7 170 ng SATM in 50 µl PBS overnight at 4°C, then blocked at room temperature for 1 hour  
8 by applying 200 µl of 3.75% BSA in PBS-T. Monoclonal antibodies starting from 100  
9 µg/mL were four-folds serial diluted with blocking buffer to 12 gradients and incubated  
10 with plates for 1 hour at room temperature, followed by incubation with horseradish  
11 peroxidase (HRP) conjugated sheep anti-mouse secondary antibody (MP Biomedicals)  
12 1:5000 diluted in blocking buffer for 30 min at room temperature. Plates were incubated  
13 for 15 min at room temperature with 1-Step Turbo TMB-ELISA Substrate Solution  
14 (Thermo Fisher), then terminated with equal volume of 1M phosphoric acid. Signal was  
15 quantified by measuring absorbance at 450 nanometer using iMark Microplate  
16 Absorbance Reader (Bio-Rad Laboratories). Half-maximum effective concentration  
17 (EC<sub>50</sub>) was calculated by non-linear regression analysis of absorbance curve.

18

#### 19 **ACE2-binding inhibition assay**

20 For spike pull-down assay, SATM glycoprotein was incubated with 1 µg anti-  
21 spike antibody in 50 µl binding buffer (PBS supplemented with 0.1% NP-40) at room  
22 temperature for 1 hour, then 3 µg of ACE2-SBP recombinant protein was applied the  
23 reaction for 1 hour. The ACE2-SBP was pull-down by 10µl Dynabeads M-270  
24 Streptavidin (Thermo Fisher) for 30 min at room temperature, followed by washing twice

1 with binding buffer and elution with SDS-PAGE loading dye at 95°C for 5 min. ACE2-  
2 Spike binding inhibition was examined by SDS-PAGE, followed by WB using antibody  
3 R52.

4 For bead-based neutralization assay, 20 µl of Streptavidin beads were incubated  
5 with 4 µg of RBD-SBP in 100 µl of TBSTx (TBS supplemented with 1% TritonX-100)  
6 overnight at 4°C with shaking. After washing, beads were incubated with diluted  
7 antibodies for 20 min at 4°C, washed, incubated with 4 µg/mL of ACE2-FLAG for 20  
8 min at 4°C, washed, and incubated with an anti-DYKDDDDK antibody conjugated with  
9 APC fluorophore (MBL) for 20 min at 4°C. After the final wash, the mean fluorescence  
10 intensity (MFI) of beads was analyzed by a FACS Verse (BD). The relative MFI of beads  
11 was calculated by normalization using the MFI of beads incubated with non-immune  
12 mouse IgG.

13

#### 14 **Virus neutralization assay**

15 SARS-CoV-2 virus (obtained from the National Institute of Infectious Diseases)  
16 was prepared from culture fluids harvested from infected VeroE6/TMPRSS2 cells (JCRB  
17 Cell Bank, JCRB1819) (Matsuyama et al., 2020). The virus titer was  $3 \times 10^7$  TCID<sub>50</sub>/mL.  
18 The virus solution containing 1500 TCID<sub>50</sub> was incubated with each antibody at  
19 concentrations of serial threefold dilutions starting from 5 µg/mL. After incubating at  
20 room temperature for 1 h, the antibody-treated virus solution was mixed with  
21 VeroE6/TMPRSS2 cells in glass-bottom 96-well plates. At 7 h post-infection, cells were  
22 fixed in 4% PFA and subjected to indirect immunofluorescence assays using S1D7  
23 antibody as described above. The number of infected cells were imaged and analyzed  
24 using ArrayScan (Thermo Fisher). Mouse anti-FLAG M2 antibody (Sigma) was also used

1 as a control. Experiments with SARS-CoV-2 were performed in a biosafety level 3

2 (BSL3) containment laboratory at University of Tsukuba.

3

4

5

## 1 **Figure Legends**

### 2 **Figure 1. Production of six monoclonal antibodies against spike protein**

- 3 A. Schematic of recombinant proteins used to establish anti-spike antibodies SS, signal  
4 peptide; NTD, N-terminal domain; RBD, receptor-binding domain; TM,  
5 transmembrane domain;  $\Delta$ TM, spike lacking TM domain; SBP, streptavidin binding  
6 peptide; Foldon, T4 fabritin trimerization motif; GST, glutathione S-transferase; MBP,  
7 maltose binding protein. For mammalian expression constructs ( $\Delta$ TM-SBP and  
8 RBD-SBP), the HRV3C cleavage site was placed upstream of the SBP tag so that the  
9 SBP tag could be removed by HRV3C protease treatment after protein purification  
10 (Fig. S1A).
- 11 B. Coomassie brilliant blue (CBB) staining of recombinant protein purified from *E. coli*  
12 expression system. GST-RBD and MBP-RBD appeared as bands of 46 kDa and 62  
13 kDa, respectively.
- 14 C. CBB staining of recombinant proteins purified from the mammalian expression  
15 system. The glycosylation of recombinant proteins caused smear bands and a lower  
16 migration rate of proteins on SDS-PAGE compared to proteins treated with PNGase.
- 17 D. ELISA-binding affinity of purified monoclonal antibodies to trimeric  $\Delta$ TM and  
18 RBD glycoproteins purified from the mammalian expression system. n.i., non-  
19 immune mouse IgG Error bars indicate standard deviation (n=3).
- 20 E. Summary of isotype and  $EC_{50}$  of established monoclonal antibodies.
- 21 F. Western blotting (WB) against  $\Delta$ TM and RBD glycoproteins (10 or 50 ng per lane)  
22 using purified monoclonal antibodies (1  $\mu$ g/mL in PBS-T). Clone S1D7 and S3D7  
23 could not detect either  $\Delta$ TM or RBD in WB.
- 24 G. Detection of non-glycosylated  $\Delta$ TM using established monoclonal antibodies. Four

1 clones could detect SATM (30 ng per lane), regardless of glycosylation.

2 H. Detection of spike proteins expressed in 293T cells. Lysates of 293T cells expressing  
3 artificial spikes carrying T4 foldon (artificial spike) or wild-type spike glycoproteins  
4 were separated by SDS-PAGE, followed by WB using antibody R52.

5

## 6 **Figure 2. Application for immunoprecipitation and immunofluorescence**

7 A. Immunoprecipitation (IP) of trimeric glycosylated spike protein (SATM) using  
8 established monoclonal antibodies. S1, S1D7; S3, S3D8; ni, non-immune mouse IgG;  
9 In, input; SATM, trimeric spike protein without transmembrane domain; HC, IgG  
10 heavy chain; LC, IgG light chain. All clones were capable of pulling down RBD and  
11 Spike glycoprotein. Higher IP efficiency of Spike glycoprotein was observed in  
12 clones R22, R31, S1D7, and S3D8. For RBD glycoprotein, clone R22, S1D7, and  
13 S3D8 showed higher IP efficiency.

14 B. IP of trimeric spike protein de-glycosylated by PNGase F using established  
15 monoclonal antibodies. "SATM" indicates SATM glycoprotein untreated with  
16 PNGase F. All clones are capable of pulling down de-glycosylated spike protein.  
17 Higher IP efficiency was observed in clone R22, R31, S1D7, and S3D8.

18 C. Immunofluorescence (IF) staining of spike glycoprotein expressed in HeLa cells with  
19 monoclonal antibodies S1D7 and S3D8. Spike protein localized on the apical surface  
20 of transfected HeLa cells Scale bar, 30  $\mu$ m.

21

## 22 **Figure 3. Inhibition of ACE2-spike interaction by S1D7 and S3D8**

23 A. A schematic of the spike pull-down assay designed to evaluate inhibition of ACE2-  
24 spike binding by monoclonal antibody. Spike glycoprotein lacking TM domain

- 1 (SΔTM) was mixed with a monoclonal antibody. ACE2-SBP was applied to capture  
2 SΔTM onto streptavidin beads competitively. Captured SΔTM was detected by WB  
3 as a measurement of the antibody's inhibitory ability. S1, S1D7; S3, S3D8; ni, non-  
4 immune mouse IgG.
- 5 B. WB of spike pull-down assay using antibody R52. In the presence of clones S1D7  
6 and S3D8, ACE2 was not able to pull down SΔTM.
- 7 C. Schematic of bead-based neutralization assay designed to quantify inhibition of  
8 ACE2-RBD binding by monoclonal antibody. RBD-SBP glycoprotein immobilized  
9 on streptavidin beads was mixed with a monoclonal antibody. ACE2-FLAG was  
10 applied to bind competitively with RBD. ACE2-RBD binding was quantified by  
11 measuring the signal given by an anti-FLAG antibody conjugated with APC  
12 fluorophore using FACS.
- 13 D. One set of representative FACS results of a bead-based neutralization assay in the  
14 presence of 4 μg/mL monoclonal antibodies. Clones S1D7 and S3D8 significantly  
15 inhibited ACE2-RBD interaction, shown as lowered fluorescence intensity of APC.
- 16 E. Binding profiles of potent neutralizing antibodies. ni, non-immune mouse IgG. Error  
17 bars indicate standard deviation (n=3). Clones R22 and R31 showed no inhibition of  
18 ACE2-RBD binding, while S1D7 and S3D8 inhibited ACE2-RBD interaction at  
19 lower ng/mL levels.

20

21 **Figure 4. S1D7 and S3D8 neutralized SARS-CoV-2 infection**

- 22 A. Spike glycoprotein was expressed in VeroE6/TM2 cells during SARS-CoV-2  
23 infection. Spike glycoproteins were detected by western blots using anti-spike  
24 antibodies R22 and R52.

1 B. Immunofluorescence staining of spike glycoprotein expressed in VeroE6/TM2 cells  
2 infected with SARS-CoV-2 at 7 h post-infection. Scale bar, 20  $\mu$ m.

3 C. S1D7 and S3D8 are capable of neutralizing live virus infections. Although clone R22  
4 failed to protect VeroE6/TM2 cells from SARS-CoV-2 infection, S1D7 and S3D8  
5 blocked SARS-CoV-2 infection significantly with IC<sub>50</sub> values of 405.2 ng/mL and  
6 139 ng/mL, respectively. S1D7 and S3D8 cocktail showed intermediate neutralizing  
7 activity (200.1 ng/mL). Error bars indicate standard deviation (n=3).

8

9



1 **Supplemental Figure Legends**

2 **Figure S1**

3 A. Recombinant spike glycoproteins were treated with HRV3C protease to remove SBP-  
4 tag before immunizing mice.

5 B. Clone R52 showed the highest performance on western blotting among our  
6 antibodies and detected even 0.08 ng S $\Delta$ TM glycoprotein.

7

8 **Figure S2**

9 A. Monoclonal antibody clones S1D7 and S3D8 maintain high efficiency even in the  
10 presence of 0.1% SDS. S1, S1D7; S3, S3D8; ni, non-immune IgG; In, input.

11 B. Immunofluorescence (IF) staining of spike glycoprotein expressed in HeLa cells with  
12 all six monoclonal antibodies. S1D7 and S3D8 showed higher performance in IF.  
13 Images were captured using a Keyence BZ-X810 fluorescence microscope. Scale bar,  
14 200  $\mu$ m.

15

16 **Figure S3**

17 A. ACE2-SBP protein was purified from the culture supernatant of Expi293F cells  
18 transfected with a plasmid encoding ACE2-SBP.

19

## 1 **References**

- 2 Artika, I. M., Dewantari, A. K., & Wiyatno, A. (2020). Molecular biology of coronaviruses: current  
3 knowledge. *Heliyon*, 6(8), e04743. doi:10.1016/j.heliyon.2020.e04743
- 4 Bao, L., Deng, W., Huang, B., Gao, H., Liu, J., Ren, L., . . . Qin, C. (2020). The pathogenicity of SARS-  
5 CoV-2 in hACE2 transgenic mice. *Nature*, 583(7818), 830-833. doi:10.1038/s41586-020-2312-y
- 6 Callaway, E. (2020). The race for coronavirus vaccines: a graphical guide. *Nature*, 580(7805), 576-577.  
7 doi:10.1038/d41586-020-01221-y
- 8 Cao, Y., Su, B., Guo, X., Sun, W., Deng, Y., Bao, L., . . . Xie, X. S. (2020). Potent Neutralizing Antibodies  
9 against SARS-CoV-2 Identified by High-Throughput Single-Cell Sequencing of Convalescent  
10 Patients' B Cells. *Cell*, 182(1), 73-84.e16. doi:10.1016/j.cell.2020.05.025
- 11 Caskey, M., Klein, F., & Nussenzweig, M. C. (2019). Broadly neutralizing anti-HIV-1 monoclonal  
12 antibodies in the clinic. *Nat Med*, 25(4), 547-553. doi:10.1038/s41591-019-0412-8
- 13 Chen, X., Li, R., Pan, Z., Qian, C., Yang, Y., You, R., . . . Ye, L. (2020). Human monoclonal antibodies  
14 block the binding of SARS-CoV-2 spike protein to angiotensin converting enzyme 2 receptor.  
15 *Cellular and Molecular Immunology*, 17(6), 647-649. doi:10.1038/s41423-020-0426-7
- 16 Chi, X., Yan, R., Zhang, J., Zhang, G., Zhang, Y., Hao, M., . . . Chen, W. (2020). A neutralizing human  
17 antibody binds to the N-terminal domain of the Spike protein of SARS-CoV-2. *Science*,  
18 655(August), eabc6952-eabc6952. doi:10.1126/science.abc6952
- 19 Cohen, J. (2020). The race is on for antibodies that stop the new coronavirus. *Science*.  
20 doi:10.1126/science.abc6444
- 21 Connor, E. M. (1999). Palivizumab, a humanized respiratory syncytial virus monoclonal antibody, reduces  
22 hospitalization from respiratory syncytial virus infection in high-risk infants. the IMPact-RSV  
23 study group. *Radiology*, 210(1), 295-296.
- 24 Corti, D., Cameroni, E., Guarino, B., Kallewaard, N. L., Zhu, Q., & Lanzavecchia, A. (2017). Tackling  
25 influenza with broadly neutralizing antibodies. *Curr Opin Virol*, 24, 60-69.  
26 doi:10.1016/j.coviro.2017.03.002
- 27 Corti, D., Misasi, J., Mulangu, S., Stanley, D. A., Kanekiyo, M., Wollen, S., . . . Sullivan, N. J. (2016).  
28 Protective monotherapy against lethal Ebola virus infection by a potently neutralizing antibody.  
29 *Science*, 351(6279), 1339-1342. doi:10.1126/science.aad5224
- 30 Corti, D., Passini, N., Lanzavecchia, A., & Zamboni, M. (2016). Rapid generation of a human monoclonal  
31 antibody to combat Middle East respiratory syndrome. *J Infect Public Health*, 9(3), 231-235.  
32 doi:10.1016/j.jiph.2016.04.003
- 33 Dhama, K., Sharun, K., Tiwari, R., Dadar, M., Malik, Y. S., Singh, K. P., & Chaicumpa, W. (2020). COVID-  
34 19, an emerging coronavirus infection: advances and prospects in designing and developing  
35 vaccines, immunotherapeutics, and therapeutics. *Hum Vaccin Immunother*, 16(6), 1232-1238.  
36 doi:10.1080/21645515.2020.1735227

- 1 Dinnon, K. H., 3rd, Leist, S. R., Schafer, A., Edwards, C. E., Martinez, D. R., Montgomery, S. A., . . . Baric,  
2 R. S. (2020). A mouse-adapted model of SARS-CoV-2 to test COVID-19 countermeasures. *Nature*.  
3 doi:10.1038/s41586-020-2708-8
- 4 Graham, B. S., & Ambrosino, D. M. (2015). History of passive antibody administration for prevention and  
5 treatment of infectious diseases. *Current Opinion in HIV and AIDS*, 10(3), 129-134.  
6 doi:10.1097/COH.000000000000154
- 7 Hansel, T. T., Kropshofer, H., Singer, T., Mitchell, J. A., & George, A. J. (2010). The safety and side effects  
8 of monoclonal antibodies. *Nat Rev Drug Discov*, 9(4), 325-338. doi:10.1038/nrd3003
- 9 Hassan, A. O., Case, J. B., Winkler, E. S., Thackray, L. B., Kafai, N. M., Bailey, A. L., . . . Diamond, M. S.  
10 (2020). A SARS-CoV-2 Infection Model in Mice Demonstrates Protection by Neutralizing  
11 Antibodies. *Cell*, 182(3), 744-753.e744. doi:10.1016/j.cell.2020.06.011
- 12 Hoffmann, M., Kleine-Weber, H., Schroeder, S., Krüger, N., Herrler, T., Erichsen, S., . . . Pöhlmann, S.  
13 (2020). SARS-CoV-2 Cell Entry Depends on ACE2 and TMPRSS2 and Is Blocked by a Clinically  
14 Proven Protease Inhibitor. *Cell*, 181(2), 271-280.e278. doi:10.1016/j.cell.2020.02.052
- 15 Huang, C., Wang, Y., Li, X., Ren, L., Zhao, J., Hu, Y., . . . Cao, B. (2020). Clinical features of patients  
16 infected with 2019 novel coronavirus in Wuhan, China. *The Lancet*, 395(10223), 497-506.  
17 doi:10.1016/s0140-6736(20)30183-5
- 18 Israelow, B., Song, E., Mao, T., Lu, P., Meir, A., Liu, F., . . . Iwasaki, A. (2020). Mouse model of SARS-  
19 CoV-2 reveals inflammatory role of type I interferon signaling. *J Exp Med*, 217(12).  
20 doi:10.1084/jem.20201241
- 21 Iwasaki, Y. W., Murano, K., Ishizu, H., Shibuya, A., Iyoda, Y., Siomi, M. C., . . . Saito, K. (2016). Piwi  
22 Modulates Chromatin Accessibility by Regulating Multiple Factors Including Histone H1 to  
23 Repress Transposons. *Mol Cell*, 63(3), 408-419. doi:10.1016/j.molcel.2016.06.008
- 24 Jawhara, S. (2020). Could Intravenous Immunoglobulin Collected from Recovered Coronavirus Patients  
25 Protect against COVID-19 and Strengthen the Immune System of New Patients? *Int J Mol Sci*,  
26 21(7). doi:10.3390/ijms21072272
- 27 Jiang, R. D., Liu, M. Q., Chen, Y., Shan, C., Zhou, Y. W., Shen, X. R., . . . Shi, Z. L. (2020). Pathogenesis  
28 of SARS-CoV-2 in Transgenic Mice Expressing Human Angiotensin-Converting Enzyme 2. *Cell*,  
29 182(1), 50-58 e58. doi:10.1016/j.cell.2020.05.027
- 30 Jiang, S., Hillyer, C., & Du, L. (2020). Neutralizing Antibodies against SARS-CoV-2 and Other Human  
31 Coronaviruses. *Trends in Immunology*, 41(5), 355-359. doi:10.1016/j.it.2020.03.007
- 32 Ju, B., Zhang, Q., Ge, J., Wang, R., Sun, J., Ge, X., . . . Zhang, L. (2020). Human neutralizing antibodies  
33 elicited by SARS-CoV-2 infection. *Nature*, 584(7819), 115-119. doi:10.1038/s41586-020-2380-z
- 34 Kissler, S. M., Tedijanto, C., Goldstein, E., Grad, Y. H., & Lipsitch, M. (2020). Projecting the transmission  
35 dynamics of SARS-CoV-2 through the postpandemic period. *Science*, 368(6493), 860-868.  
36 doi:10.1126/science.abb5793

- 1 Klasse, P. J., & Moore, J. P. (2020). Antibodies to SARS-CoV-2 and their potential for therapeutic passive  
2 immunization. *eLife*, 9, 1-11. doi:10.7554/ELIFE.57877
- 3 Kohler, G., & Milstein, C. (1975). Continuous cultures of fused cells secreting antibody of predefined  
4 specificity. *Nature*, 256(5517), 495-497. doi:10.1038/256495a0
- 5 Li, Q., Guan, X., Wu, P., Wang, X., Zhou, L., Tong, Y., . . . Feng, Z. (2020). Early Transmission Dynamics  
6 in Wuhan, China, of Novel Coronavirus-Infected Pneumonia. *N Engl J Med*, 382(13), 1199-1207.  
7 doi:10.1056/NEJMoa2001316
- 8 Liu, L., Wang, P., Nair, M. S., Yu, J., Rapp, M., Wang, Q., . . . Ho, D. D. (2020). Potent neutralizing  
9 antibodies against multiple epitopes on SARS-CoV-2 spike. *Nature*, 584(7821), 450-456.  
10 doi:10.1038/s41586-020-2571-7
- 11 Matsuyama, S., Nao, N., Shirato, K., Kawase, M., Saito, S., Takayama, I., . . . Takeda, M. (2020). Enhanced  
12 isolation of SARS-CoV-2 by TMPRSS2- expressing cells. *Proceedings of the National Academy  
13 of Sciences of the United States of America*, 117(13), 7001-7003. doi:10.1073/pnas.2002589117
- 14 Miroshnikov, K. A., Marusich, E. I., Cerritelli, M. E., Cheng, N., Hyde, C. C., Steven, A. C., &  
15 Mesyanzhinov, V. V. (1998). Engineering trimeric fibrous proteins based on bacteriophage T4  
16 adhesins. *Protein Eng*, 11(4), 329-332. doi:10.1093/protein/11.4.329
- 17 Murano, K., Iwasaki, Y. W., Ishizu, H., Mashiko, A., Shibuya, A., Kondo, S., . . . Siomi, H. (2019). Nuclear  
18 RNA export factor variant initiates piRNA-guided co-transcriptional silencing. *EMBO J*, 38(17),  
19 e102870. doi:10.15252/embj.2019102870
- 20 Ni, L., Ye, F., Cheng, M. L., Feng, Y., Deng, Y. Q., Zhao, H., . . . Dong, C. (2020). Detection of SARS-  
21 CoV-2-Specific Humoral and Cellular Immunity in COVID-19 Convalescent Individuals.  
22 *Immunity*, 52(6), 971-977.e973. doi:10.1016/j.immuni.2020.04.023
- 23 Opstelten, D. J., Raamsman, M. J., Wolfs, K., Horzinek, M. C., & Rottier, P. J. (1995). Envelope  
24 glycoprotein interactions in coronavirus assembly. *J Cell Biol*, 131(2), 339-349.  
25 doi:10.1083/jcb.131.2.339
- 26 Ou, X., Liu, Y., Lei, X., Li, P., Mi, D., Ren, L., . . . Qian, Z. (2020). Characterization of spike glycoprotein  
27 of SARS-CoV-2 on virus entry and its immune cross-reactivity with SARS-CoV. *Nature  
28 Communications*(2020). doi:10.1038/s41467-020-15562-9
- 29 Pinto, D., Park, Y. J., Beltramello, M., Walls, A. C., Tortorici, M. A., Bianchi, S., . . . Corti, D. (2020).  
30 Cross-neutralization of SARS-CoV-2 by a human monoclonal SARS-CoV antibody. *Nature*,  
31 583(7815), 290-295. doi:10.1038/s41586-020-2349-y
- 32 Reichert, J. M., Rosensweig, C. J., Faden, L. B., & Dewitz, M. C. (2005). Monoclonal antibody successes  
33 in the clinic. *Nat Biotechnol*, 23(9), 1073-1078. doi:10.1038/nbt0905-1073
- 34 Riva, L., Yuan, S., Yin, X., Martin-Sancho, L., Matsunaga, N., Pache, L., . . . Chanda, S. K. (2020).  
35 Discovery of SARS-CoV-2 antiviral drugs through large-scale compound repurposing. *Nature*.  
36 doi:10.1038/s41586-020-2577-1

- 1 Robbiani, D. F., Gaebler, C., Muecksch, F., Lorenzi, J. C. C., Wang, Z., Cho, A., . . . Nussenzweig, M. C.  
2 (2020). Convergent antibody responses to SARS-CoV-2 in convalescent individuals. *Nature*,  
3 584(7821), 437-442. doi:10.1038/s41586-020-2456-9
- 4 Rogers, T. F., Zhao, F., Huang, D., Beutler, N., Burns, A., He, W.-t., . . . Burton, D. R. (2020). Isolation of  
5 potent SARS-CoV-2 neutralizing antibodies and protection from disease in a small animal model.  
6 *Science*, 7520(June), eabc7520-eabc7520. doi:10.1126/science.abc7520
- 7 Sadasivan, J., Singh, M., & Sarma, J. D. (2017). Cytoplasmic tail of coronavirus spike protein has  
8 intracellular targeting signals. *J Biosci*, 42(2), 231-244. doi:10.1007/s12038-017-9676-7
- 9 Shi, R., Shan, C., Duan, X., Chen, Z., Liu, P., Song, J., . . . Yan, J. (2020). A human neutralizing antibody  
10 targets the receptor-binding site of SARS-CoV-2. *Nature*, 584(7819), 120-124.  
11 doi:10.1038/s41586-020-2381-y
- 12 Song, W., Gui, M., Wang, X., & Xiang, Y. (2018). Cryo-EM structure of the SARS coronavirus spike  
13 glycoprotein in complex with its host cell receptor ACE2. *PLoS Pathog*, 14(8), e1007236.  
14 doi:10.1371/journal.ppat.1007236
- 15 Stertz, S., Reichelt, M., Spiegel, M., Kuri, T., Martinez-Sobrido, L., Garcia-Sastre, A., . . . Kochs, G. (2007).  
16 The intracellular sites of early replication and budding of SARS-coronavirus. *Virology*, 361(2),  
17 304-315. doi:10.1016/j.virol.2006.11.027
- 18 Tai, W., Zhang, X., He, Y., Jiang, S., & Du, L. (2020). Identification of SARS-CoV RBD-targeting  
19 monoclonal antibodies with cross-reactive or neutralizing activity against SARS-CoV-2. *Antiviral*  
20 *Research*, 179(April), 104820-104820. doi:10.1016/j.antiviral.2020.104820
- 21 Tse, L. V., Meganck, R. M., Graham, R. L., & Baric, R. S. (2020). The Current and Future State of Vaccines,  
22 Antivirals and Gene Therapies Against Emerging Coronaviruses. *Front Microbiol*, 11, 658.  
23 doi:10.3389/fmicb.2020.00658
- 24 Walker, L. M., & Burton, D. R. (2018). Passive immunotherapy of viral infections: 'super-antibodies' enter  
25 the fray. *Nature Reviews Immunology*, 18(5), 297-308. doi:10.1038/nri.2017.148
- 26 Walls, A. C., Park, Y. J., Tortorici, M. A., Wall, A., McGuire, A. T., & Velesler, D. (2020). Structure,  
27 Function, and Antigenicity of the SARS-CoV-2 Spike Glycoprotein. *Cell*, 181(2), 281-292.e286.  
28 doi:10.1016/j.cell.2020.02.058
- 29 Wan, J., Xing, S., Ding, L., Wang, Y., Gu, C., Wu, Y., . . . Lan, F. (2020). Human-IgG-Neutralizing  
30 Monoclonal Antibodies Block the SARS-CoV-2 Infection. *Cell Reports*, 32(3), 107918-107918.  
31 doi:10.1016/j.celrep.2020.107918
- 32 Wang, C., Li, W., Drabek, D., Okba, N. M. A., van Haperen, R., Osterhaus, A. D. M. E., . . . Bosch, B. J.  
33 (2020). A human monoclonal antibody blocking SARS-CoV-2 infection. *Nature Communications*,  
34 11(1), 1-6. doi:10.1038/s41467-020-16256-y
- 35 Winkler, E. S., Bailey, A. L., Kafai, N. M., Nair, S., McCune, B. T., Yu, J., . . . Diamond, M. S. (2020).  
36 SARS-CoV-2 infection of human ACE2-transgenic mice causes severe lung inflammation and

- 1           impaired function. *Nat Immunol.* doi:10.1038/s41590-020-0778-2
- 2   Wrapp, D., Wang, N., Corbett, K. S., Goldsmith, J. A., Hsieh, C. L., Abiona, O., . . . McLellan, J. S. (2020).
- 3           Cryo-EM structure of the 2019-nCoV spike in the prefusion conformation. *Science*, 367(6483),
- 4           1260-1263. doi:10.1126/science.aax0902
- 5   Wu, Y., Wang, F., Shen, C., Peng, W., Li, D., Zhao, C., . . . Liu, L. (2020). A noncompeting pair of human
- 6           neutralizing antibodies block COVID-19 virus binding to its receptor ACE2. *Science*, 368(6496),
- 7           1274-1278. doi:10.1126/science.abc2241
- 8   Zeng, X., Li, L., Lin, J., Li, X., Liu, B., Kong, Y., . . . Liu, J. (2020). Isolation of a human monoclonal
- 9           antibody specific for the receptor binding domain of SARS-CoV-2 using a competitive phage
- 10          biopanning strategy. *Antibody Therapeutics*, 3(2), 95-100. doi:10.1093/abt/tbaa008
- 11   Zost, S. J., Gilchuk, P., Case, J. B., Binshtein, E., Chen, R. E., Nkolola, J. P., . . . Crowe, J. E., Jr. (2020).
- 12          Potently neutralizing and protective human antibodies against SARS-CoV-2. *Nature*, 584(7821),
- 13          443-449. doi:10.1038/s41586-020-2548-6
- 14

# Fig. 1

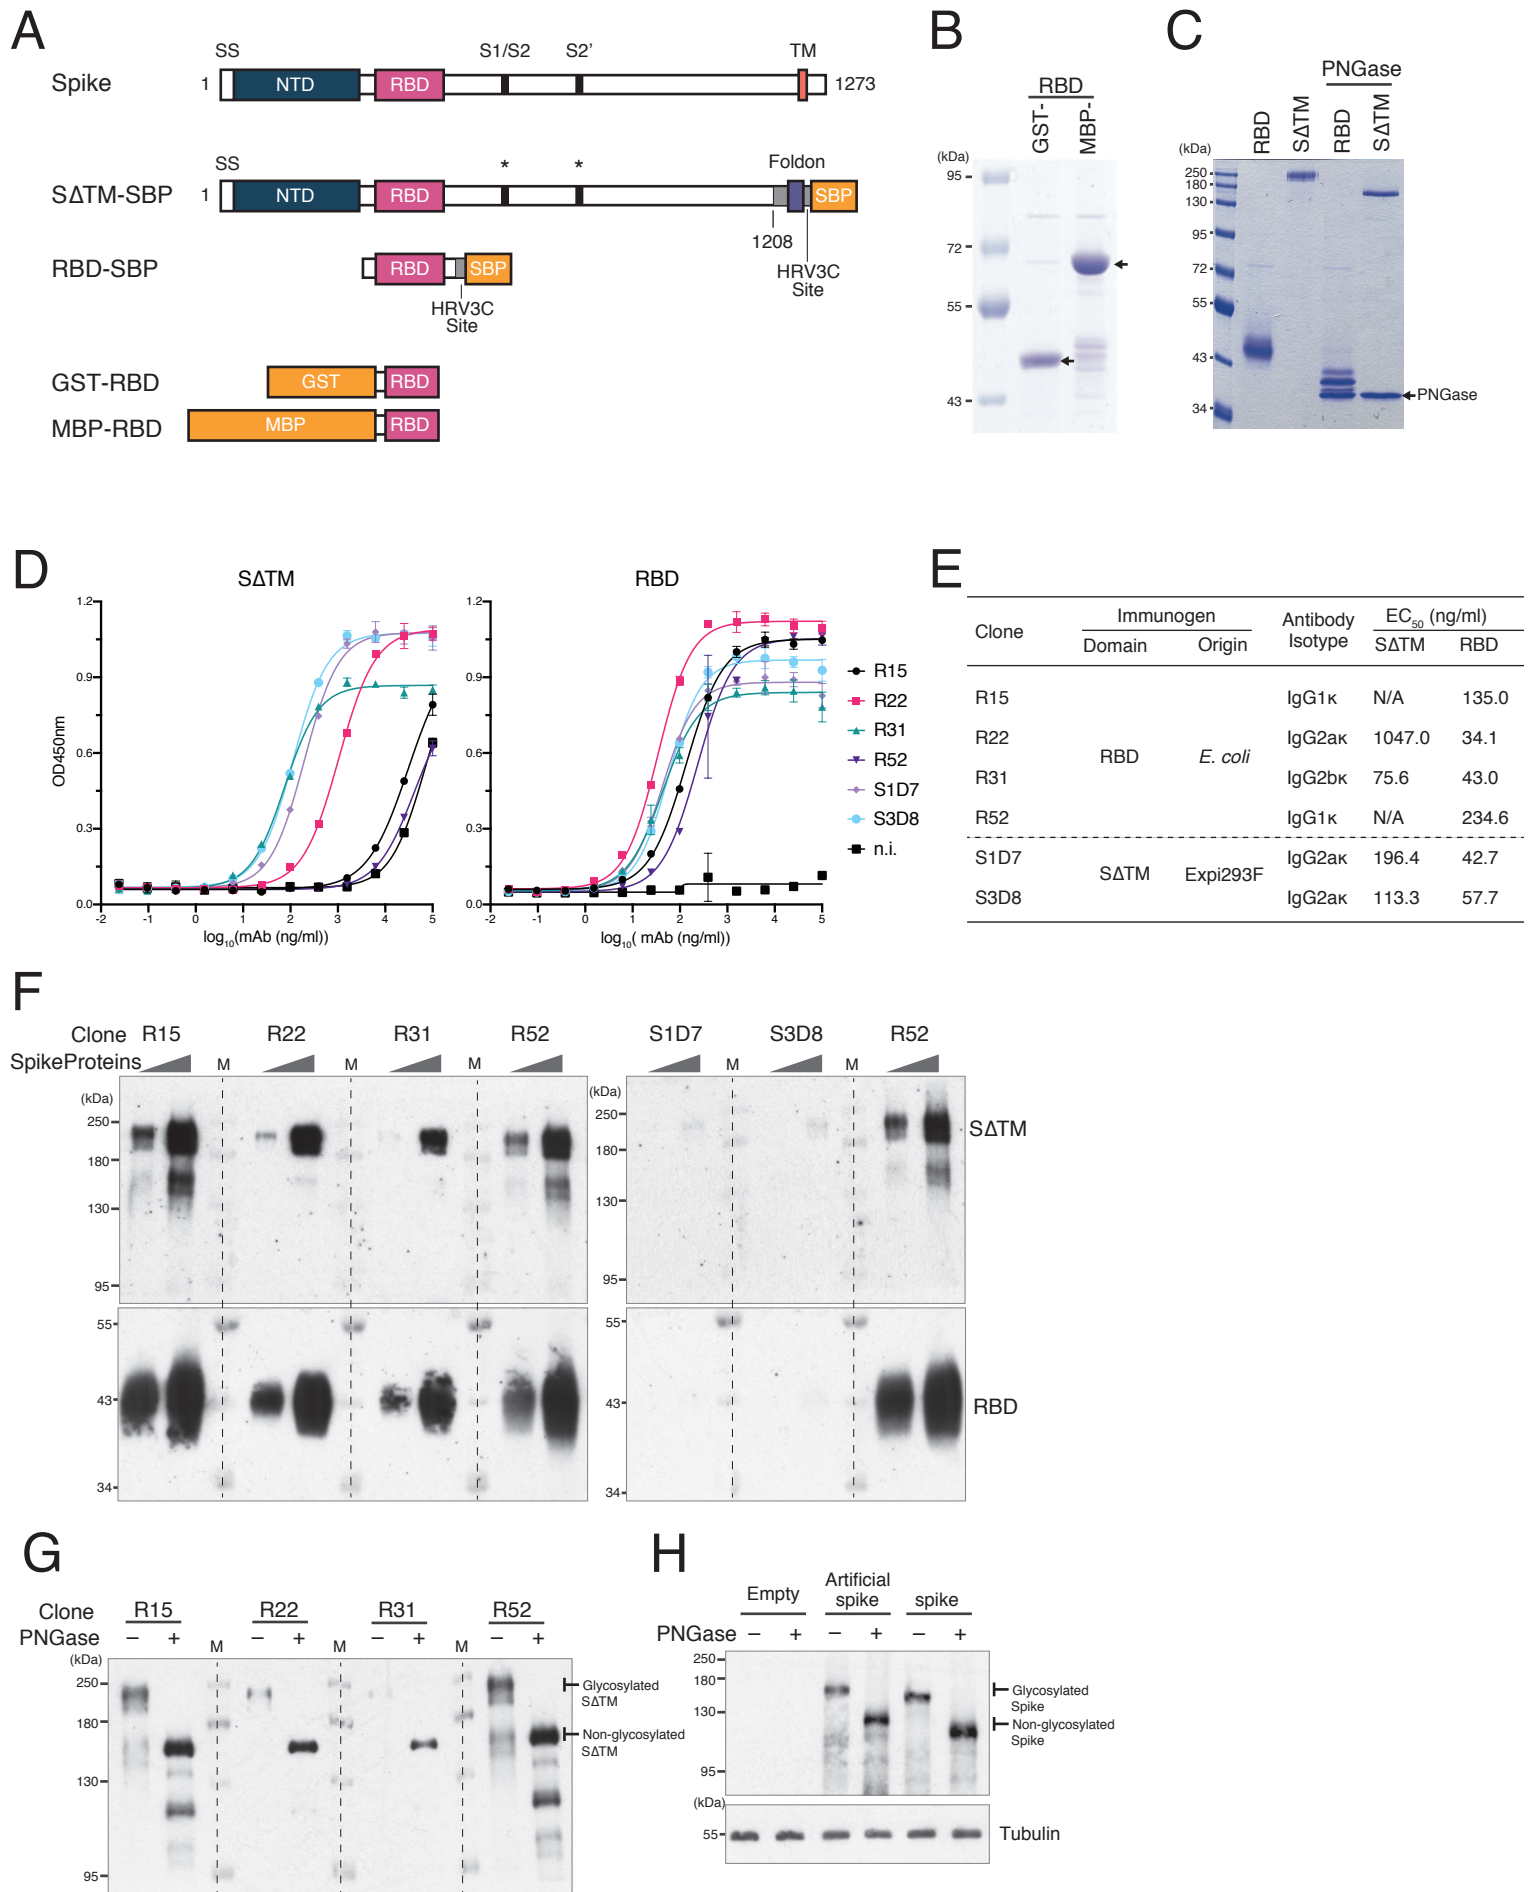

## Fig. 2

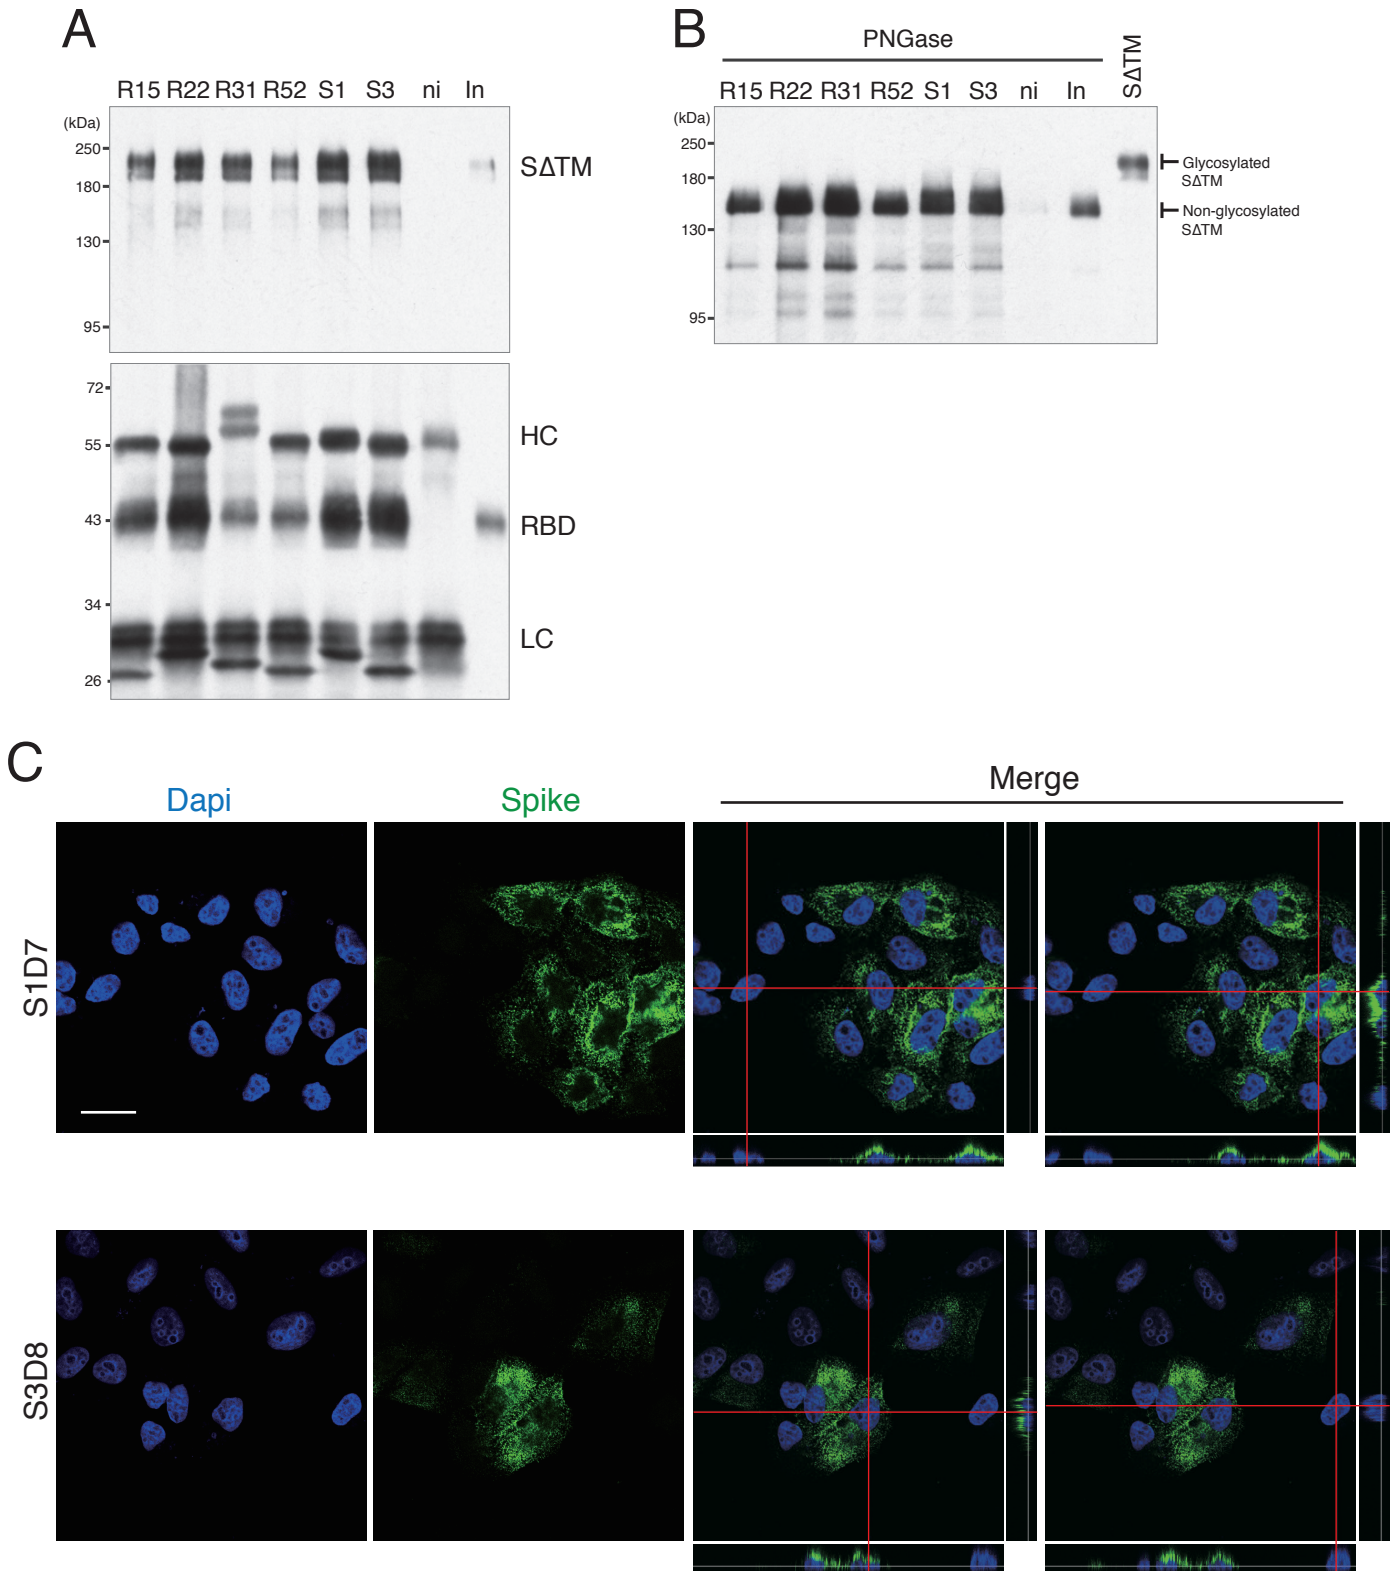



# Fig. 3

Guo *et al.*

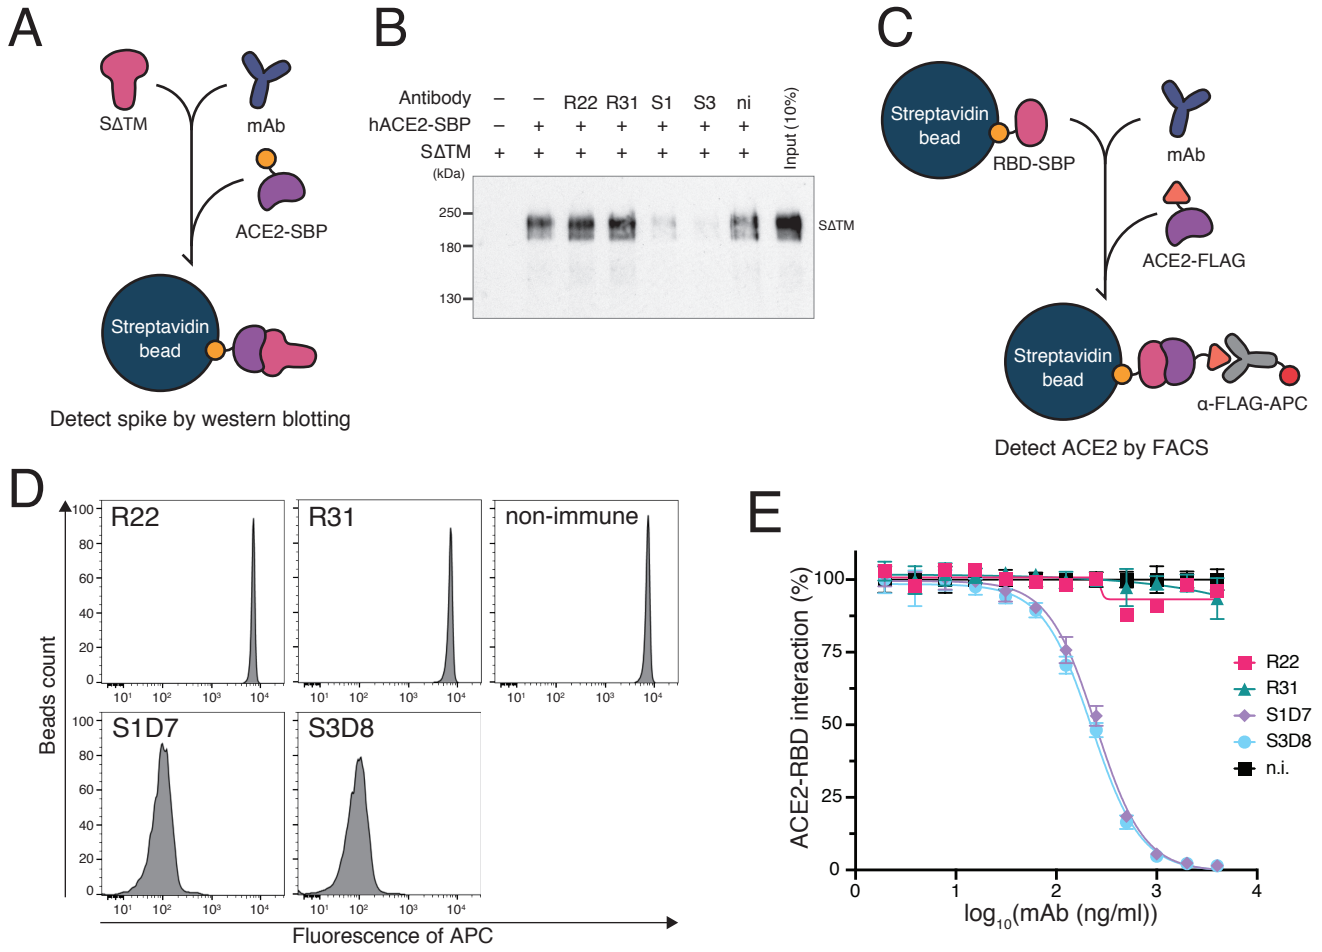

# Fig. 4

Guo *et al.*

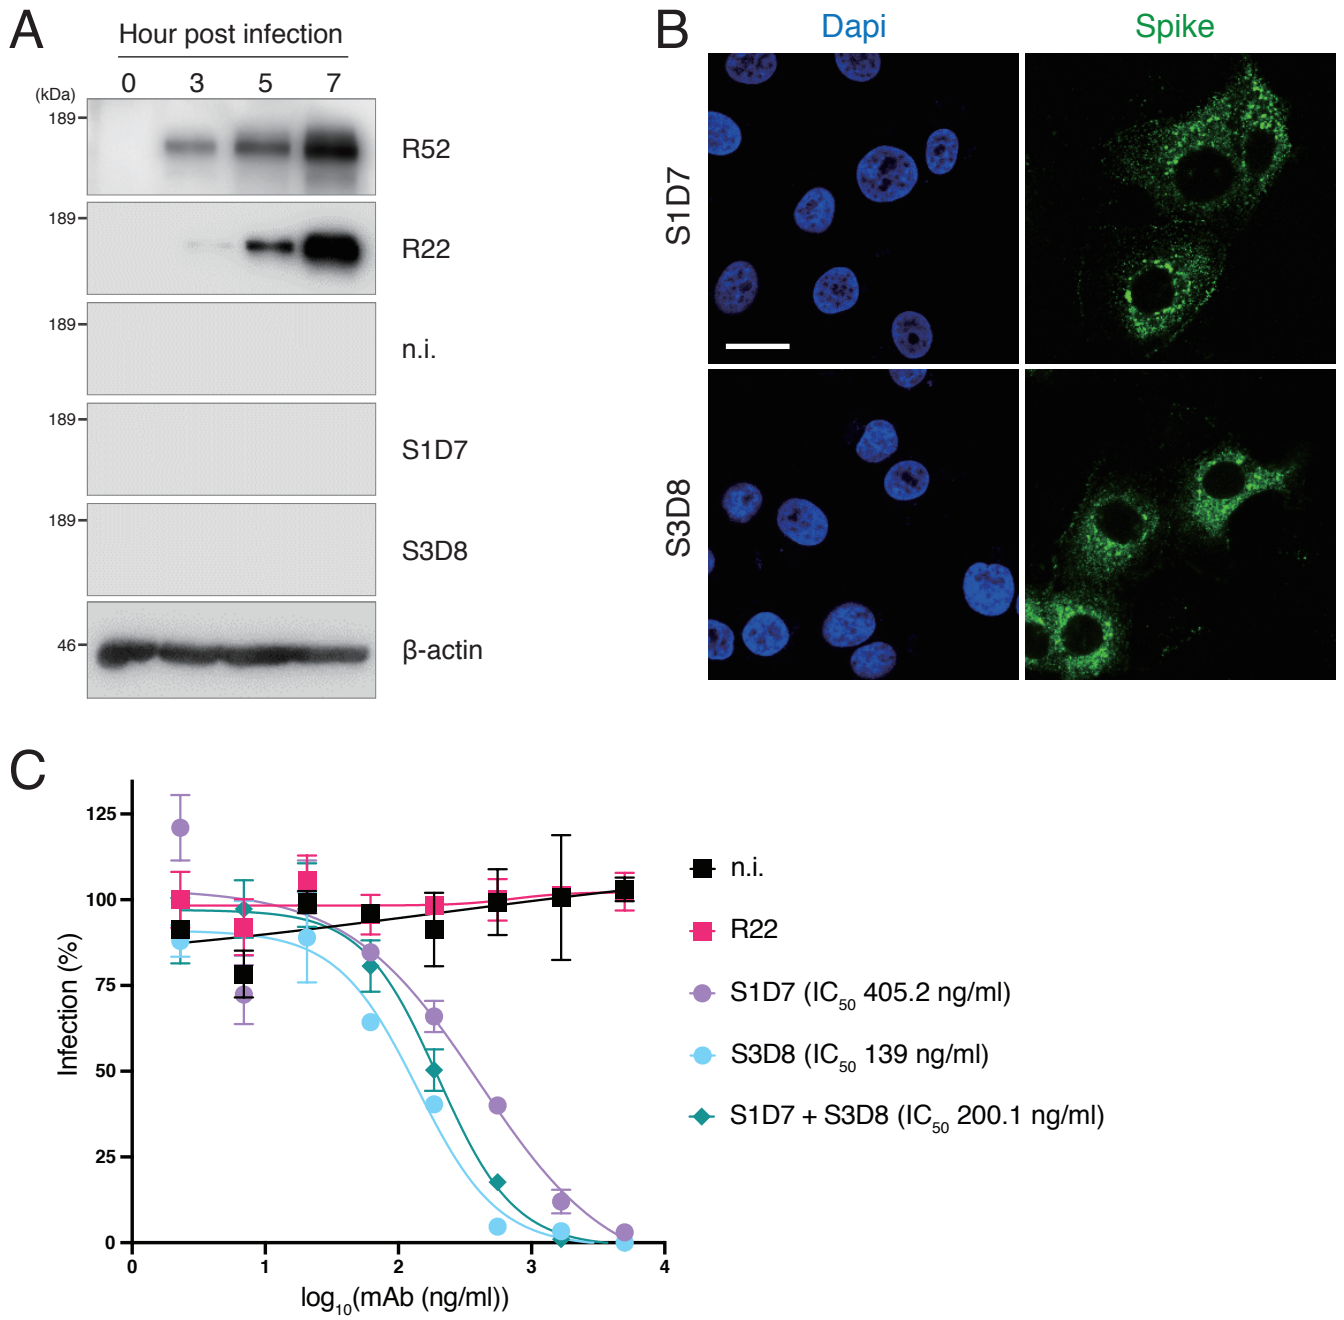

# Table 1

Table 1. Monoclonal antibodies neutralizing SARS-CoV-2 infection.

| Clone     | Host species | Cell line  | Virus titer |     |     | IC <sub>50</sub> (ng/ml) | Reference                         |
|-----------|--------------|------------|-------------|-----|-----|--------------------------|-----------------------------------|
|           |              |            | TCID50      | PFU | FFU |                          |                                   |
| BD-368-2  |              | Vero       | -           | 100 | -   | 15                       | Cao <i>et al.</i> , Cell          |
| 0304-3H3  |              | VeroE6     | 100         | -   | -   | 110                      | Chi <i>et al.</i> , Science       |
| 1B07*     |              | VeroE6     |             | -   | 100 | 37                       | Hassan <i>et al.</i> , Cell       |
| P2C-1F11  |              | VeroE6     | -           | -   | 600 | 15                       | Ju <i>et al.</i> , Nature         |
| S309      | Human        | VeroE6     | -           | -   | 100 | 79                       | Pinto <i>et al.</i> , Nature      |
| CC6.33    |              | HeLa-ACE2  | -           | 150 | -   | 39                       | Roger <i>et al.</i> , Science     |
| CB6       |              | VeroE6     | 100         | -   | -   | 36                       | Shi <i>et al.</i> , Nature        |
| 47D11     |              | VeroE6     | 500         | -   | -   | 570                      | Wang C <i>et al.</i> , Nat Commun |
| B38       |              | Vero       | 100 / 200   | -   | -   | 177 / 1,967              | Wu <i>et al.</i> , Science        |
| COV2-2196 |              | VeroE6     | -           | -   | 100 | 15                       | Zost <i>et al.</i> , Nature       |
| S1D7      | Mouse        | VeroE6/TM2 |             |     |     | 405.2                    | This paper                        |
| S3D8      |              | VeroE6/TM2 | 1500        | -   | -   | 139                      |                                   |

\*1B07 is a chimeric monoclonal antibody which combines mouse Fv and human Fc.

# Fig. S1

Guo *et al.*

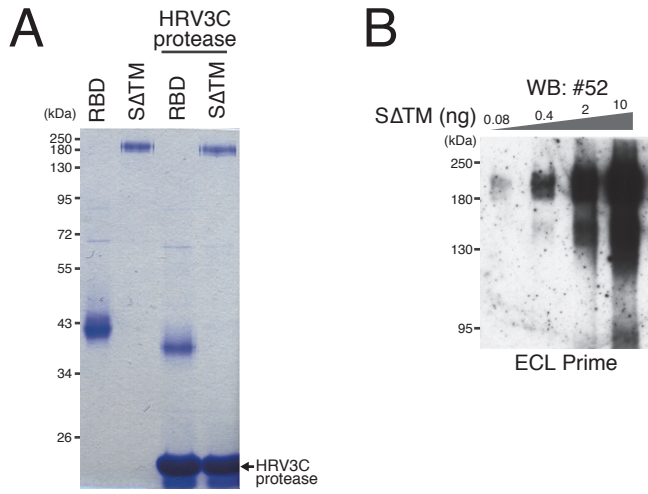

# Fig. S2

Guo *et al.*

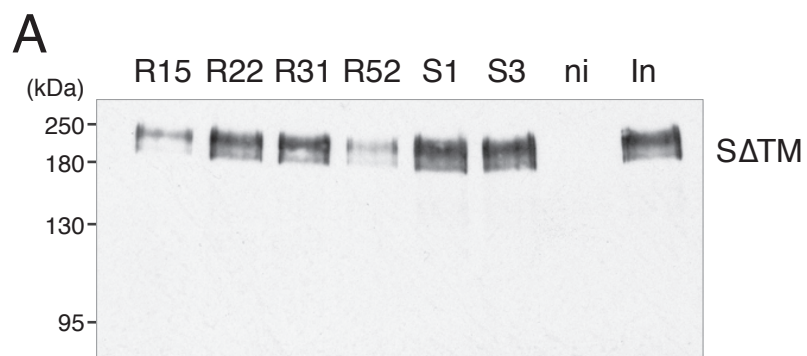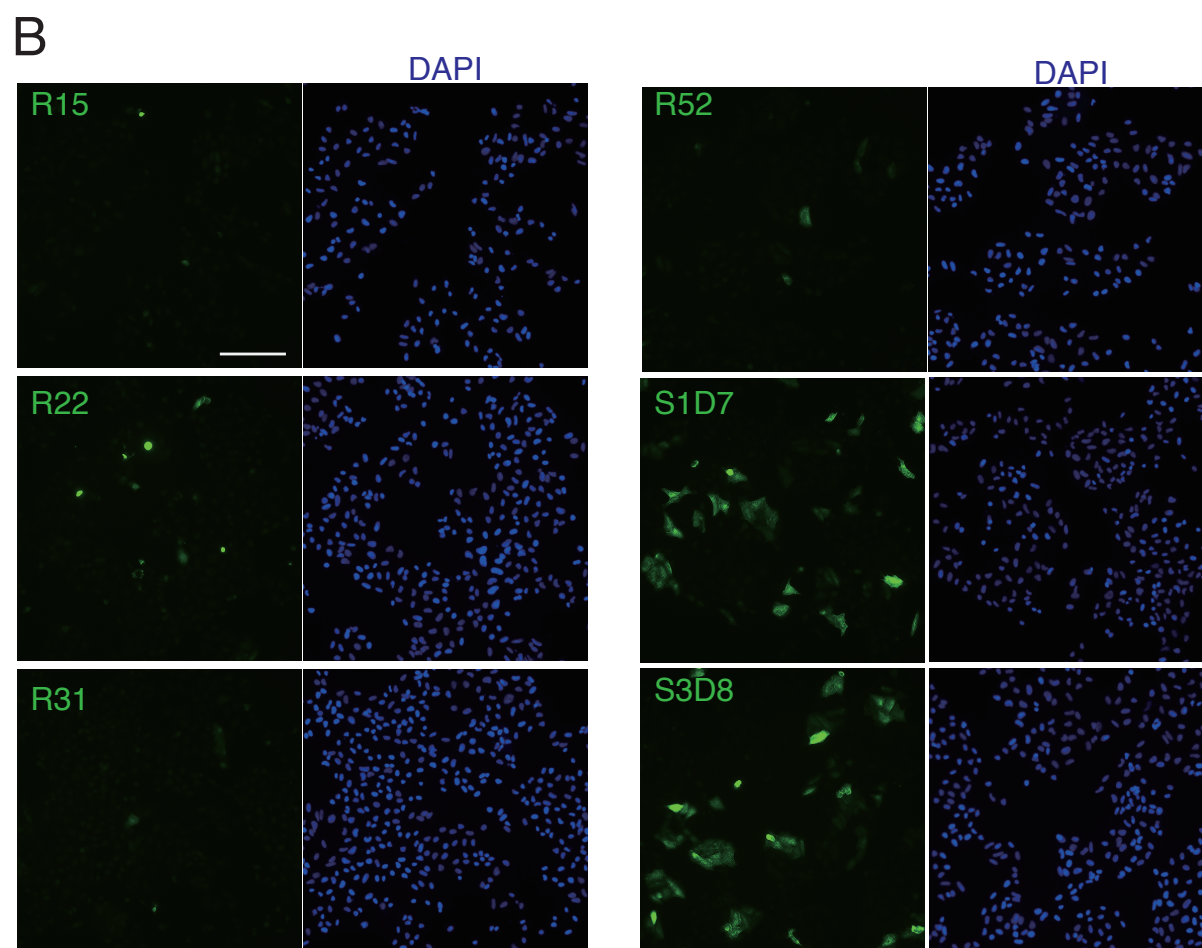

# Fig. S3

Guo *et al.*

## A

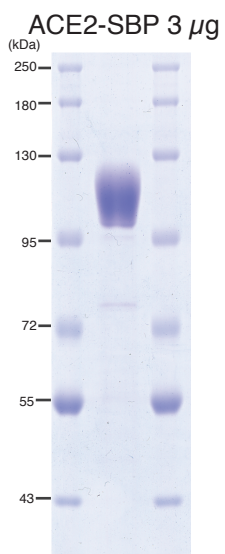

Source: https://www.biorxiv.org/content/10.1101/2020.10.01.323220v1.full.pdf
